# Supplementary material for: Degradation Behavior of Polypropylene during Reprocessing and Its Biocomposites: Thermal and Oxidative Degradation Kinetics
Source: PubMed Central journal article supplement (PMC7464851; doi:10.3390/polym12081627), 2020-07-22
Supplement: polymers-12-01627-s001.pdf [file polymers-12-01627-s001.pdf]

## Supporting Information

### Degradation behavior of polypropylene and its biocomposites during reprocessing: thermal and oxidative degradation kinetics

Elnaz Esmizadeh, Costas Tzoganakis, and Tizazu H. Mekonnen\*

*Department of Chemical Engineering, Institute of Polymer Research, University of Waterloo,  
Waterloo, ON, Canada*

\*Corresponding Author(s) – E-mail: [tmekonnen@uwaterloo.ca](mailto:tmekonnen@uwaterloo.ca)

#### Content

- S1. Chemical variation of PP after the recycling process
- S2. The effect of processing cycle number on mixing torque and melt flow index of PP
- S3. The effect of reprocessing cycles on the degradation of PP at heating rates of 10 oC/min and 40 °C/min
- S4. The convoluted PP degradation peak and the calculated degree of conversion evolution for PP<sup>v</sup>W60 sample under the inert and reactive atmosphere

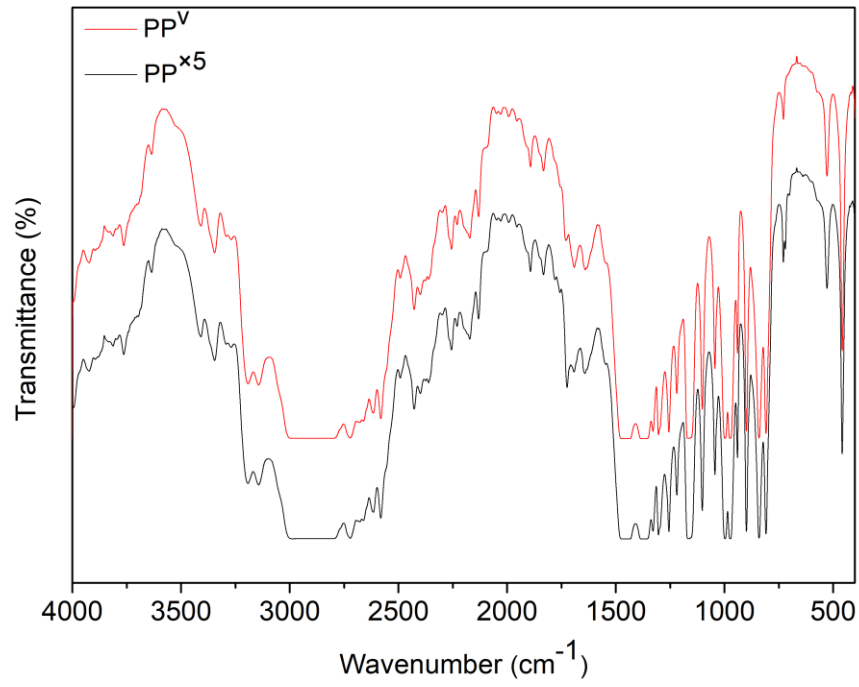

**Figure S1. FTIR spectrum of PP and its recyclates**

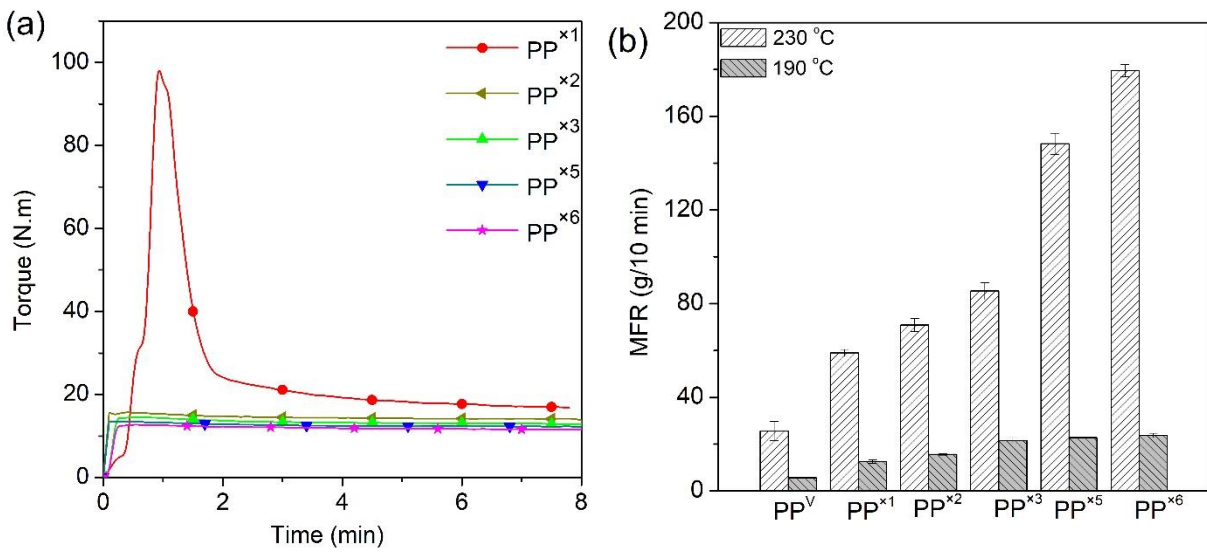

**Figure S2. Processing of polypropylene (a) Evolution of torque and (b) MFR of PP as a function of the number of processing cycles**

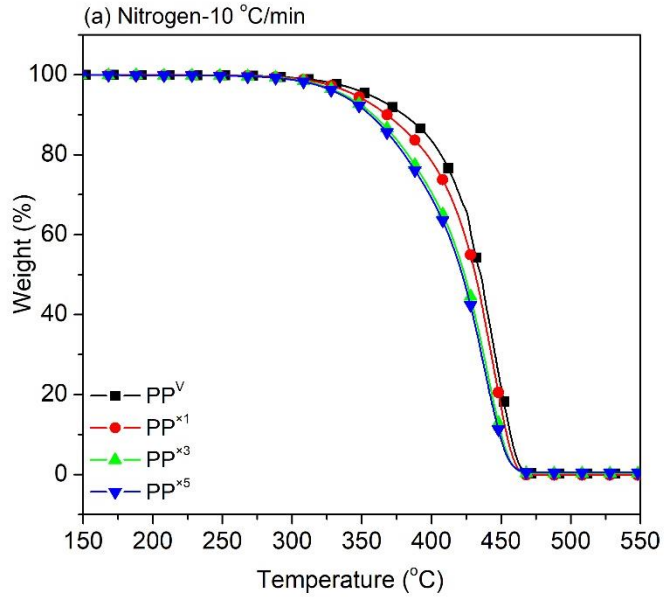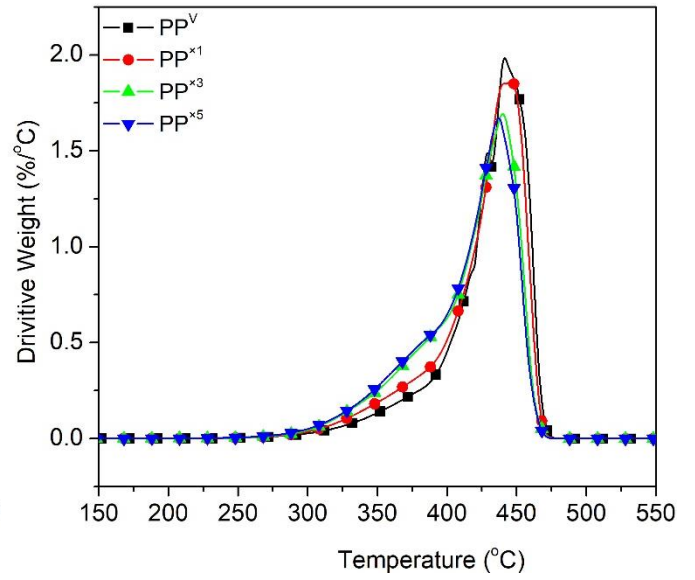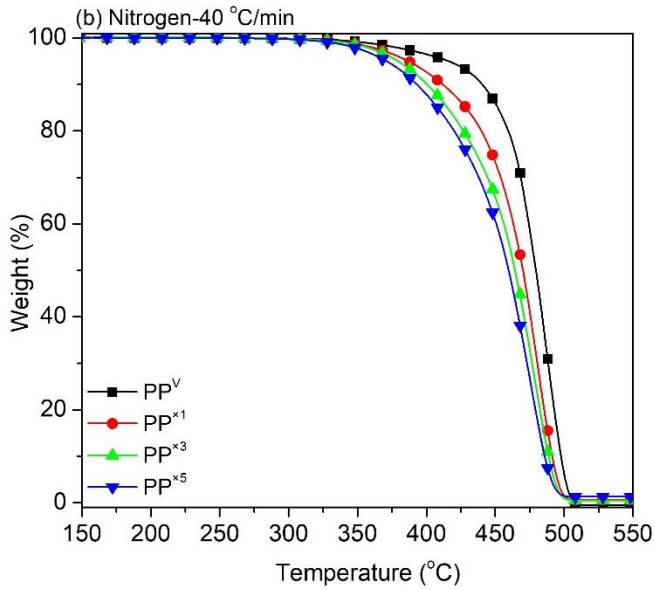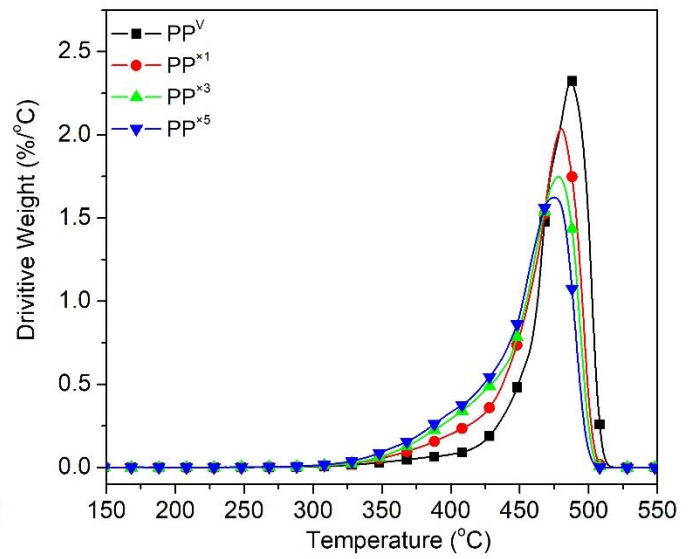

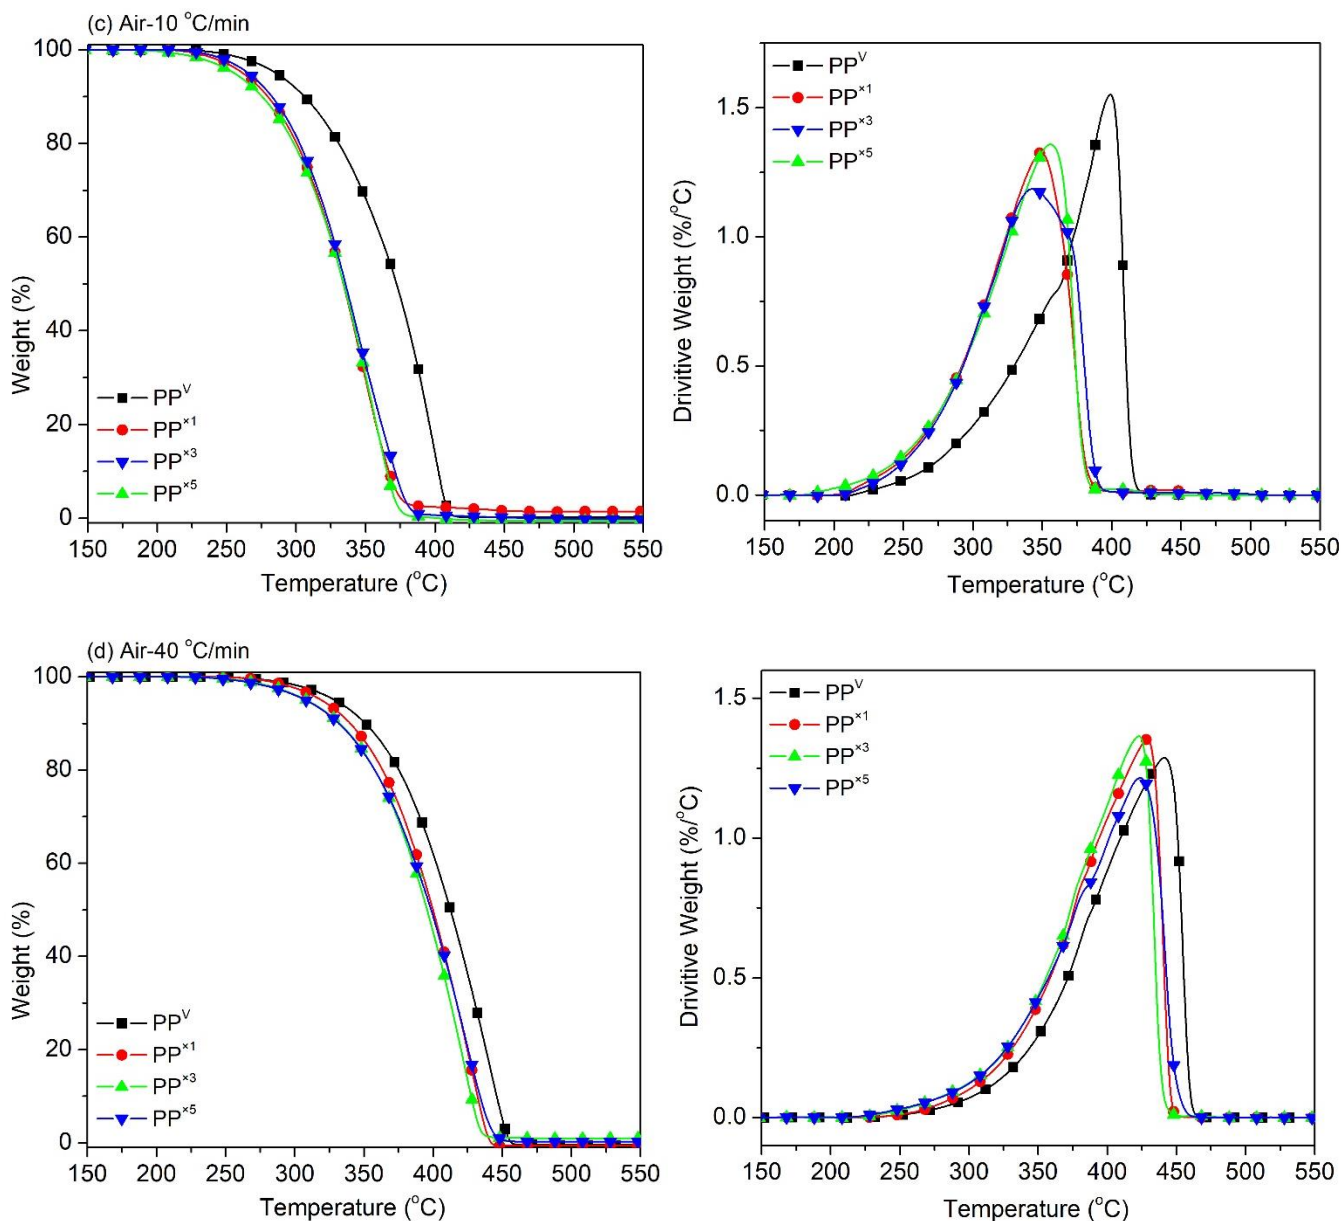

**Figure S3. TG and DTG curves for the effect of reprocessing cycles on the decomposition of PP at various heating rates: (a) 10 °C/min under N<sub>2</sub>, (b) 40 °C/min under N<sub>2</sub>, (c) 10 °C/min under the air, (d) 40 °C/min under O<sub>2</sub>**

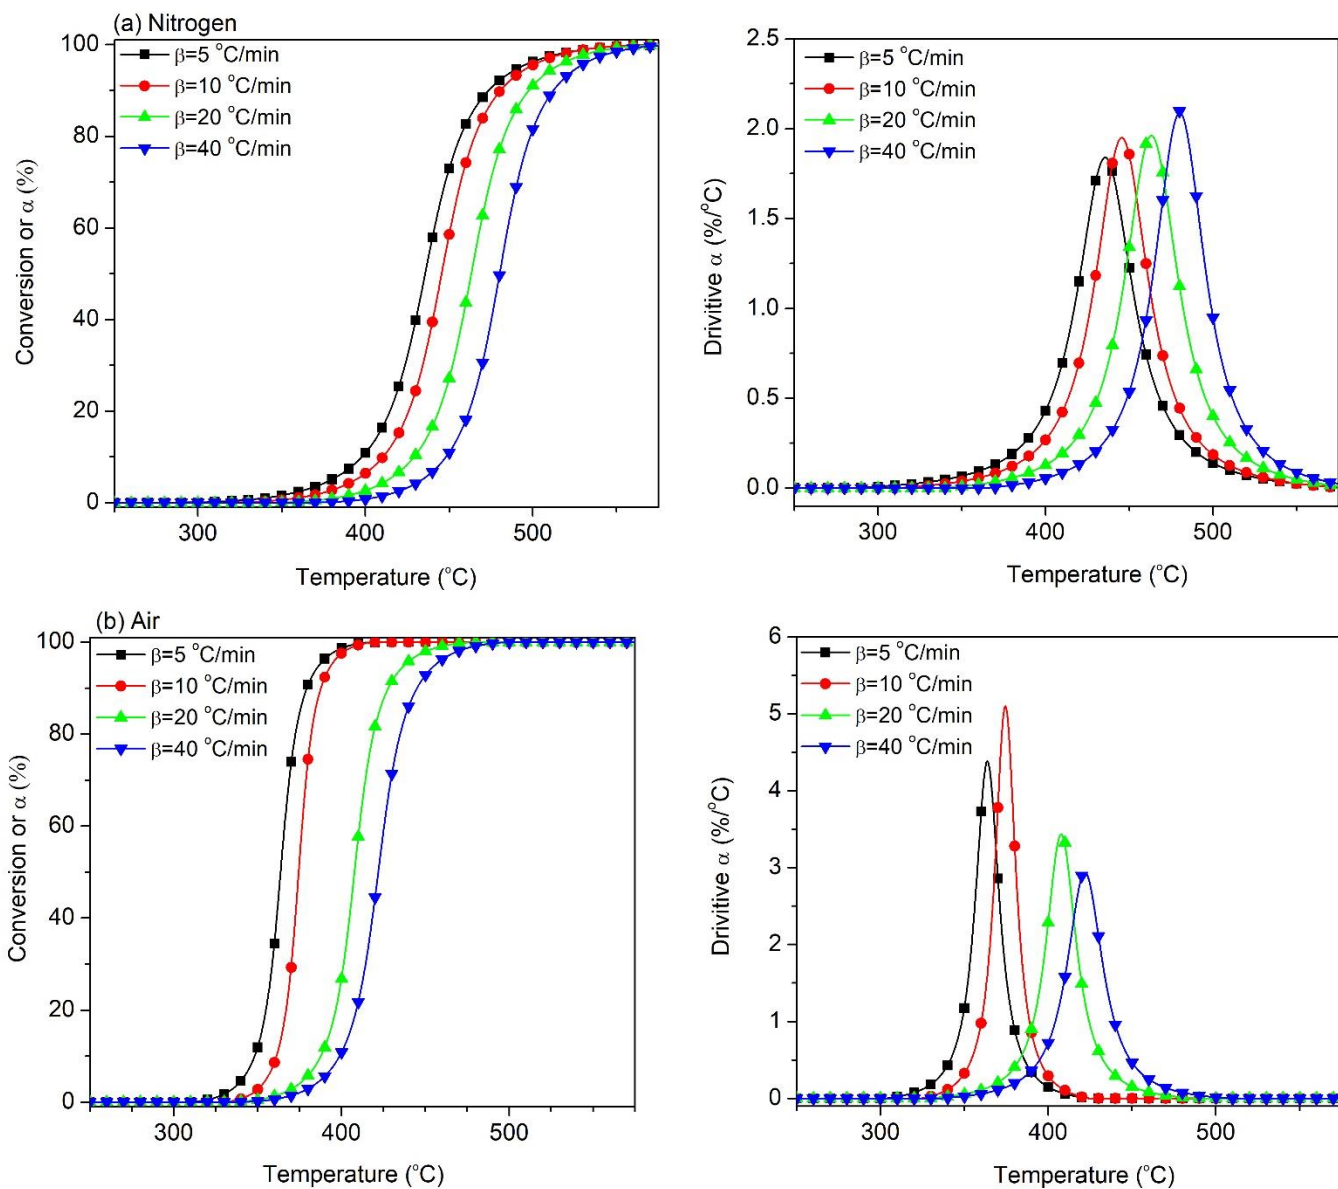

**Figure S4. Separated PP degradation obtained from deconvolution of PP<sup>V</sup>W60 under different atmospheres: (a) Nitrogen, (b) Air**
